# Supplementary material
Source: publisher figshare collection journal article supplement (https://asha.figshare.com/ndownloader/files/14981819)
Supplement: Supplementary file 1 [file 14981819]

**Supplemental Material S1.** Coding definitions for all variables included in the review.

| #                                  | Variable name                       | Definition                                                                                                                                                                                                                                         |
|------------------------------------|-------------------------------------|----------------------------------------------------------------------------------------------------------------------------------------------------------------------------------------------------------------------------------------------------|
| <b>Participant Characteristics</b> |                                     |                                                                                                                                                                                                                                                    |
| 1                                  | Total child participants            | Total number of participants who are children/youth with disabilities                                                                                                                                                                              |
| 2                                  | Child participants meeting criteria | Total number of participants who meet inclusion criteria (i.e., age birth to 21, have congenital disability, use aided AAC)                                                                                                                        |
| 3                                  | Primary disability                  | <i>Mutually exclusive for each child participant; only code for children meeting inclusion criteria for this review. Code based on what is indicated by authors as primary disability.</i>                                                         |
|                                    | Autism                              | Diagnosis or eligibility label of autism or ASD (with or without intellectual disability)                                                                                                                                                          |
|                                    | Orthopedic impairment               | Diagnosis of cerebral palsy or another orthopedic impairment (with or without intellectual disability)                                                                                                                                             |
|                                    | Developmental delay                 | Nine years of age or younger, have reported developmental delays, and not included in any of the other disability categories                                                                                                                       |
|                                    | Other communication disorder        | Diagnosis or eligibility label of a specific speech or language impairment not reported to result from another disability, including but not limited to developmental apraxia of speech                                                            |
|                                    | Intellectual disability             | Diagnosis or eligibility label of intellectual disability and does not meet criteria for another disability category, or reported diagnosis of a specific genetic syndrome typically associated with intellectual disability (e.g., Down syndrome) |
|                                    | Multiple disability                 | Eligibility label of multiple disabilities or reported to have multiple disabilities (e.g., deaf-blind and intellectual disability)                                                                                                                |
| 4                                  | Child age                           | List participant(s) age in years                                                                                                                                                                                                                   |
| 5                                  | Natural partner number              | Total number of natural communication partners who were involved in delivering the intervention (i.e., using aided AAC modeling) to students meeting inclusion criteria                                                                            |
| 6                                  | Natural partner roles               | <i>Code the number of each of the following that applied; the sum should equal (#5) above</i>                                                                                                                                                      |
|                                    | Peers                               | Peers, including classmates or siblings                                                                                                                                                                                                            |
|                                    | Paraprofessionals                   | Paraprofessionals or educational assistants                                                                                                                                                                                                        |
|                                    | Parents                             | Parents, including mothers, fathers, or other legal guardians                                                                                                                                                                                      |
|                                    | General educators                   | General education teachers                                                                                                                                                                                                                         |
|                                    | Special educators                   | Special education teachers                                                                                                                                                                                                                         |
|                                    | Other partner                       | If other partners were involved in delivering the intervention, name/list                                                                                                                                                                          |
| 7                                  | Researcher interventionist          | Involved researcher–interventionists and natural partners both directly delivering the intervention                                                                                                                                                |
| 8                                  | Partner sex                         | <i>Mutually exclusive for each included partner participant</i>                                                                                                                                                                                    |
|                                    | Female                              | Number reported to be female or a girl                                                                                                                                                                                                             |
|                                    | Male                                | Number reported to be male or a boy                                                                                                                                                                                                                |
|                                    | Not reported                        | Number whose sex is not reported                                                                                                                                                                                                                   |
| 9                                  | Partner race/ethnicity              | <i>Mutually exclusive for each included partner participant</i>                                                                                                                                                                                    |
|                                    | Black                               | Number reported to be Black or African American (non-Hispanic)                                                                                                                                                                                     |
|                                    | Asian                               | Number reported to be Asian or Asian American                                                                                                                                                                                                      |
|                                    | White                               | Number reported to be Anglo, White, or Caucasian (non-Hispanic)                                                                                                                                                                                    |
|                                    | Hispanic                            | Number reported to be Latino or Hispanic (of any race)                                                                                                                                                                                             |
|                                    | Native/Pacific islander             | Number reported to be Native American, American Indian, Alaskan Native, or Pacific Islander                                                                                                                                                        |
|                                    | Multiple ethnicities                | Number reported to be biracial or have multiple ethnicities                                                                                                                                                                                        |

|                                                |                                                                                                                                                                                                                                                                                                                                                                                                                                                                                                                       |
|------------------------------------------------|-----------------------------------------------------------------------------------------------------------------------------------------------------------------------------------------------------------------------------------------------------------------------------------------------------------------------------------------------------------------------------------------------------------------------------------------------------------------------------------------------------------------------|
| Not reported                                   | Number whose race/ethnicity is not reported                                                                                                                                                                                                                                                                                                                                                                                                                                                                           |
| 10 Partner age/education level                 | <i>Mutually exclusive for each included partner participant. If communication partners are same-age peers as child participant, can use the age of the child if age/grade for the peers are not reported</i>                                                                                                                                                                                                                                                                                                          |
| Peer pre-K                                     | Number of partners who are preschool-aged peers (if grades are not reported, use birth–5 years)                                                                                                                                                                                                                                                                                                                                                                                                                       |
| Peer elementary                                | Number of partners who are elementary-aged peers (if grades are not reported, use 6–11 years)                                                                                                                                                                                                                                                                                                                                                                                                                         |
| Peer secondary                                 | Number of partners who are secondary-aged peers (if grades are not reported, use 12–18 years)                                                                                                                                                                                                                                                                                                                                                                                                                         |
| Adult some high school                         | Number of partners who are reported to be adults with highest level of education some high school but no diploma                                                                                                                                                                                                                                                                                                                                                                                                      |
| Adult high school graduate                     | Number of partners who are reported to be adults with highest level of education a high school diploma                                                                                                                                                                                                                                                                                                                                                                                                                |
| Adult some college                             | Number of partners who are reported to be adults with highest level of education some college or post-secondary training, without completing a bachelor’s degree (e.g., some credits, trade school, associate degree)                                                                                                                                                                                                                                                                                                 |
| Adult bachelors                                | Number of partners who are reported to be adults with highest level of education a bachelor’s degree                                                                                                                                                                                                                                                                                                                                                                                                                  |
| Adult graduate                                 | Number of partners who are reported to be adults with highest level of education a graduate degree                                                                                                                                                                                                                                                                                                                                                                                                                    |
| Adult education not reported                   | Number of partners who are reported to be adults whose highest level of education is not reported                                                                                                                                                                                                                                                                                                                                                                                                                     |
| <b>Design and Intervention Characteristics</b> |                                                                                                                                                                                                                                                                                                                                                                                                                                                                                                                       |
| 11 Experimental design                         | <i>Mutually exclusive</i>                                                                                                                                                                                                                                                                                                                                                                                                                                                                                             |
| Group design                                   | An experiment involving a treatment group compared with a control or contrast group                                                                                                                                                                                                                                                                                                                                                                                                                                   |
| Single-case design                             | An experiment involving any recognized single-subject design with at least three opportunities for demonstration of effect                                                                                                                                                                                                                                                                                                                                                                                            |
| 12 Experimental purpose                        | <i>Mutually exclusive</i>                                                                                                                                                                                                                                                                                                                                                                                                                                                                                             |
| Demonstration                                  | Study evaluated the effect of one intervention relative to a “business as usual” or no-treatment control group or baseline (e.g., group design with one treatment and one control, single subject design such as multiple probe, multiple baseline)                                                                                                                                                                                                                                                                   |
| Comparison                                     | Study compared two or more interventions (e.g., group design with two different treatments, single subject design such as alternating treatments)                                                                                                                                                                                                                                                                                                                                                                     |
| Component analysis                             | Study investigated relative effectiveness of adding one or more components of a package intervention                                                                                                                                                                                                                                                                                                                                                                                                                  |
| 13 Aided AAC modeling approach                 | <i>Code each that applies</i>                                                                                                                                                                                                                                                                                                                                                                                                                                                                                         |
| Augmented input                                | Ongoing communication input for a child (i.e., incoming language) includes the use of an aided AAC system, typically paired with verbal speech. In other words, the child’s communication partner models the use of the AAC system in their ongoing interaction with the child, including if used to respond to a child’s communication (e.g., aided recast). Augmented input does not involve models when the child is immediately expected to imitate the model or respond (i.e., a model functioning as a prompt). |
| Models as prompts                              | The child’s communication partner provides aided AAC models intended to elicit an immediate response from the child, either as the only prompt or within a sequence of prompts. In other words, the goal of providing the model is for the child to imitate the communicative behavior.                                                                                                                                                                                                                               |
| Models within instructional demonstrations     | The child’s communication partner models aided AAC during set, relatively brief or episodic periods of time, typically with the goal of highlighting target vocabulary/grammatical structures or introducing the child to the AAC device or to a new way to use the AAC device (e.g., new vocabulary).                                                                                                                                                                                                                |
| 14 AAC type                                    | <i>Code each that applies</i>                                                                                                                                                                                                                                                                                                                                                                                                                                                                                         |

|                                                         |                                     |                                                                                                                                                                                                                                                                                                |
|---------------------------------------------------------|-------------------------------------|------------------------------------------------------------------------------------------------------------------------------------------------------------------------------------------------------------------------------------------------------------------------------------------------|
|                                                         | Speech-generating device (SGD)      | Participants used any electronic speech-generating device during the study (i.e., mid-tech or high-tech)                                                                                                                                                                                       |
|                                                         | Non-SGD                             | Participants used any non-electronic, low-tech aided AAC during the study (e.g., communication board, picture symbols, communication book)                                                                                                                                                     |
| 15                                                      | Intervention setting                | <i>Coded each that applied directly to the intervention context (i.e., not for the assessment of the dependent variable or generalization conditions)</i>                                                                                                                                      |
|                                                         | Home                                | Intervention was conducted in the child's home.                                                                                                                                                                                                                                                |
|                                                         | School                              | Intervention was conducted in the child's school, preschool, or day care.                                                                                                                                                                                                                      |
|                                                         | Clinic                              | Intervention was conducted in a university, private, or other clinic.                                                                                                                                                                                                                          |
|                                                         | Community                           | Intervention was conducted in a community setting, including but not limited to a job setting, restaurant, or other public place.                                                                                                                                                              |
|                                                         | Not reported                        | Intervention setting not reported or unclear                                                                                                                                                                                                                                                   |
| 16                                                      | Naturalistic                        | Intervention context occurred within a child's natural environment, that is, within the same activities/ settings and with the same people as the child would be with if they were not participating in the research project                                                                   |
| 17                                                      | Inclusive setting                   | Typically developing peers present were in the intervention setting, either engaged with the focus student or in similar activities alongside the participant                                                                                                                                  |
| <b>Communication Partner Instruction and Assessment</b> |                                     |                                                                                                                                                                                                                                                                                                |
| 18                                                      | Partner instruction grouping        | <i>Code each that applies</i>                                                                                                                                                                                                                                                                  |
|                                                         | Individual                          | Communication partner instruction was delivered individually (i.e., one-on-one or only one partner at a time)                                                                                                                                                                                  |
|                                                         | Group                               | Communication partner instruction was delivered in a group (i.e., > 1 partner received the instruction at the same time)                                                                                                                                                                       |
|                                                         | Not reported                        | Format (i.e., individual or group) for communication partner instruction was not reported                                                                                                                                                                                                      |
| 19                                                      | Partner instruction format          | <i>Code each that applies</i>                                                                                                                                                                                                                                                                  |
|                                                         | Pre-intervention training           | Instruction for partners was reported to involve teaching or training sessions occurring prior to the start of the intervention (i.e., before the partner began implementing the intervention directly with the child)                                                                         |
|                                                         | Concurrent support                  | Instruction for partners was reported to involve teaching or support occurring during the course of the time the partner implemented the intervention directly with the child, including but not limited to coaching, consultation, facilitation, intervention feedback, or follow-up support. |
|                                                         | Not reported                        | Format for partner instruction was not reported or unclear                                                                                                                                                                                                                                     |
| 20                                                      | Training length                     | Total number of minutes comprising pre-intervention training sessions. Do not include any time provided to concurrent support. If training length was different across participants, report the mean.                                                                                          |
| 21                                                      | Instructional strategies            | <i>Code each that applies</i>                                                                                                                                                                                                                                                                  |
|                                                         | Oral instruction                    | The instructor(s) gave instruction orally, such as to describe or explain intervention strategies, share information about the child with the disability, or explain things about the AAC device                                                                                               |
|                                                         | Model strategies                    | The instructor(s) demonstrated or modeled the skills or intervention strategies the communication partner was to use. Include live models or demonstrations here; code video models under video                                                                                                |
|                                                         | Authentic application with feedback | The instructor gave prompting, performance feedback, and/or other support while partners practiced using intervention strategies directly with the child with a disability                                                                                                                     |
|                                                         | Role play or rehearsal              | The instructor gave opportunities for partners to practice and apply intervention strategies in controlled or hypothetical contexts, such as through role play or verbal application to a case example                                                                                         |
|                                                         | Final assessment                    | The instructor gave partners a final assessment of their knowledge and/or skills before beginning the intervention, including but not limited to using a criterion assessment                                                                                                                  |

|                                                 |                                                                                                                                                                                                                                                                                                                                                                                                                                                                                              |
|-------------------------------------------------|----------------------------------------------------------------------------------------------------------------------------------------------------------------------------------------------------------------------------------------------------------------------------------------------------------------------------------------------------------------------------------------------------------------------------------------------------------------------------------------------|
| Printed materials                               | The instructor presented information in a printed or written form, such as through a handout, binder, script or protocol, or slides                                                                                                                                                                                                                                                                                                                                                          |
| Explain rationale                               | The instructor explained the rationale for the intervention strategies (e.g., why the strategies were important or effective, how they would help the student) and/or used another method to solicit the commitment of the partner to use the strategies                                                                                                                                                                                                                                     |
| Memory tool                                     | The instructor provided a memory tool (e.g., mnemonic) to help partners remember the sequential or multiple steps of an intervention strategy                                                                                                                                                                                                                                                                                                                                                |
| Pretest                                         | The instructor gave partners a pretest to assess prior knowledge before beginning instruction                                                                                                                                                                                                                                                                                                                                                                                                |
| Discussion                                      | The instructor provided time for discussion and/or for the partners to ask questions                                                                                                                                                                                                                                                                                                                                                                                                         |
| Individualized plan                             | The instructor worked with partners to create or review an individualized plan for implementing strategies in a specific context or with an individual child                                                                                                                                                                                                                                                                                                                                 |
| Self-reflection                                 | The instruction included a self-evaluation tool to promote partners' reflection on their development of skills and knowledge related to the intervention                                                                                                                                                                                                                                                                                                                                     |
| Video                                           | The instruction included the use of video, including video modeling.                                                                                                                                                                                                                                                                                                                                                                                                                         |
| Other                                           | Write in any instructional strategies or components that were reported but are not listed above                                                                                                                                                                                                                                                                                                                                                                                              |
| Not reported                                    | The instructional strategies or components comprising partner instruction were not reported or were unclear                                                                                                                                                                                                                                                                                                                                                                                  |
| 22 Levels of fidelity                           | <i>Code each that applies</i>                                                                                                                                                                                                                                                                                                                                                                                                                                                                |
| Implementation fidelity                         | Using direct, reliable measures (e.g., direct observation, checklist with key elements), assesses and reports fidelity related to adherence to practices and procedures used to instruct communication partners.                                                                                                                                                                                                                                                                             |
| Intervention fidelity                           | Using direct, reliable measures (e.g., direct observation, checklist with key elements), assesses and reports fidelity related to the communication partners' use of intervention strategies, including how well or how often partners implemented intervention strategies. Note that communication partner behaviors related to intervention strategy use may be graphed as a primary dependent variable or reported descriptively within a section on intervention or procedural fidelity. |
| No partner fidelity                             | Does not report assessment of fidelity related to the communication partners' use of intervention strategies using direct, reliable measures. Note that studies may be coded as "no partner fidelity" and include fidelity measurement of researcher behavior if researcher-interventionists directly intervened with the child alongside natural communication partners                                                                                                                     |
| 23 Partner assessment type                      | <i>Code each that applies</i>                                                                                                                                                                                                                                                                                                                                                                                                                                                                |
| Descriptive checklist-intervention only         | Assessment of fidelity related to the communication partners' use of intervention strategies involves a checklist used during the intervention phase or condition only (i.e., in single-case designs if during baseline and intervention code as "Checklist-baseline and intervention")                                                                                                                                                                                                      |
| Descriptive checklist-baseline and intervention | Assessment of fidelity related to the communication partners' use of intervention strategies involves a checklist used during both baseline and intervention phases or conditions                                                                                                                                                                                                                                                                                                            |
| Criterion assessment                            | Assessment of partners' use of intervention strategies includes a training criterion prior to the start of the intervention (e.g., partners had to demonstrate 80% accuracy prior to the start of the intervention)                                                                                                                                                                                                                                                                          |
| Graphed data                                    | Assessment of fidelity related to the communication partners' use of intervention strategies involved frequency counts of behaviors or other data from direct observations that were graphed alongside child outcomes                                                                                                                                                                                                                                                                        |
| Other partner assessment                        | Describe any other assessment of fidelity related to the communication partners' use of intervention strategies not listed above                                                                                                                                                                                                                                                                                                                                                             |

|                        |                      |                                                                                                                                                                                                                                                                                                                |
|------------------------|----------------------|----------------------------------------------------------------------------------------------------------------------------------------------------------------------------------------------------------------------------------------------------------------------------------------------------------------|
|                        | Not reported         | Assessment used to measure the communication partners' use of intervention strategies was not reported or unclear                                                                                                                                                                                              |
| <b>Social Validity</b> |                      |                                                                                                                                                                                                                                                                                                                |
| 24                     | Social validity      | Study authors assessed and reported stakeholder perspectives of social validity (e.g., feasibility, acceptability, importance, satisfaction) through formal means including interviews, questionnaires, or surveys. Do not code if the only reporting was anecdotal or methods of obtaining were not reported. |
| 25                     | Social validity type | <i>Code each that applies</i>                                                                                                                                                                                                                                                                                  |
|                        | Interviews           | Social validity assessment included interviews with stakeholders (e.g., children, communication partners, other stakeholders)                                                                                                                                                                                  |
|                        | Questionnaires       | Social validity assessment included questionnaires or surveys with stakeholders (e.g., children, communication partners, other stakeholders)                                                                                                                                                                   |
| 26                     | Validity goals       | Reported social validity assessments addressed how stakeholders perceived the goals of the intervention.                                                                                                                                                                                                       |
| 27                     | Validity procedures  | Reported social validity assessments addressed how stakeholders perceived the feasibility or acceptability of the procedures of the intervention.                                                                                                                                                              |
| 28                     | Validity outcomes    | Reported social validity assessments addressed how stakeholders perceived the outcomes of the intervention                                                                                                                                                                                                     |

---
